# Supplementary material
Source: Elsevier journal article supplement (https://rcastoragev2.blob.core.windows.net/2d5cccdccc4ce15d398c3fcf085392e1/mmc1.pdf)
Supplement: mmc1 [file mmc1.pdf]

**Supplemental Information**

**A Rab20-Dependent Membrane Trafficking Pathway  
Controls *M. tuberculosis* Replication by Regulating  
Phagosome Spaciousness and Integrity**

**Laura Schnettger, Angela Rodgers, Urska Repnik, Rachel P. Lai, Gang Pei, Martijn Verdoes, Robert J. Wilkinson, Douglas B. Young, and Maximiliano G. Gutierrez**

Figure S1

A

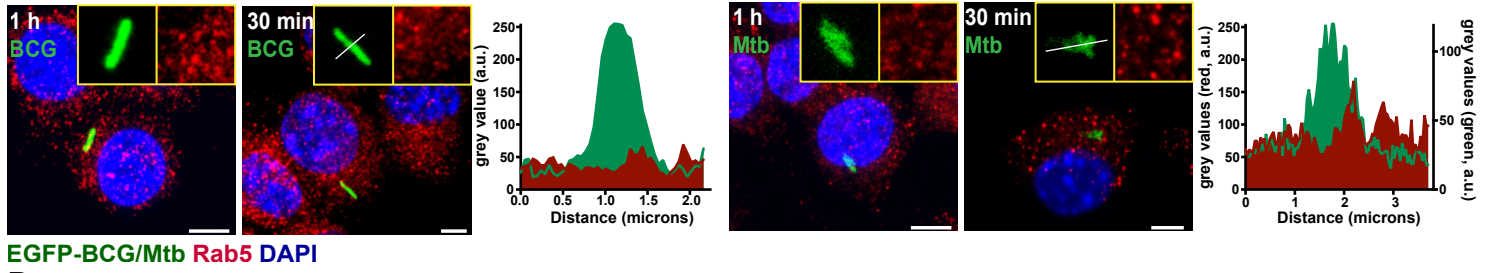

B

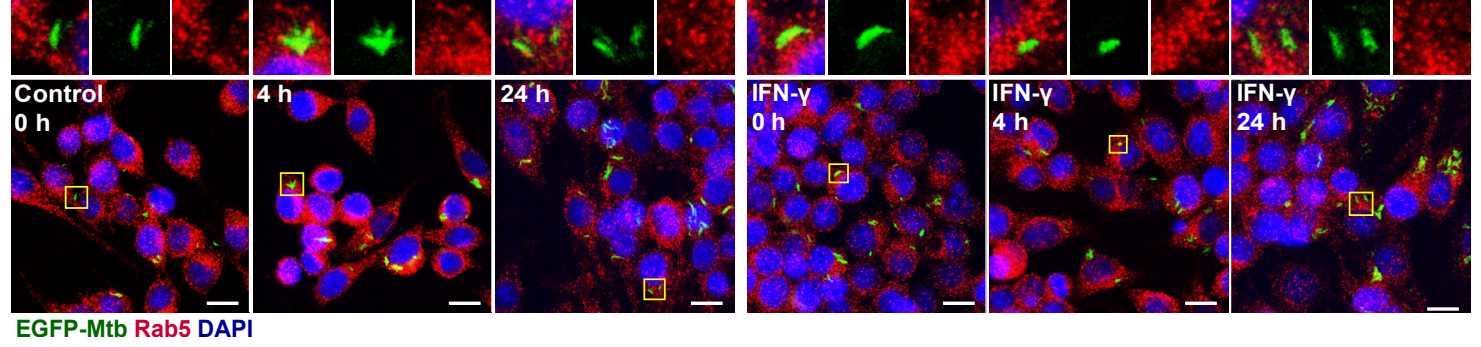

C

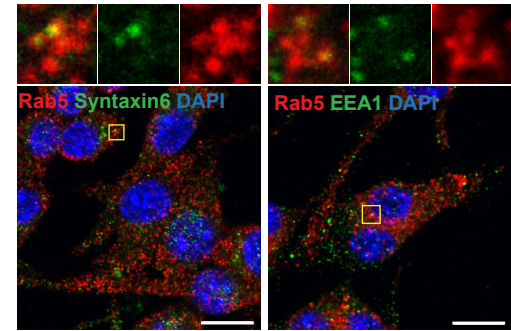

D

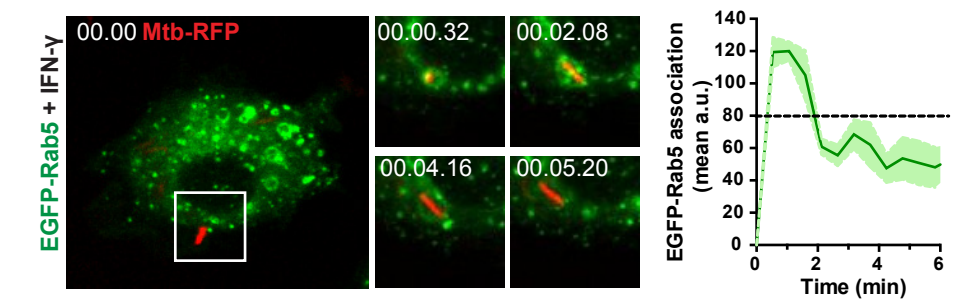

E

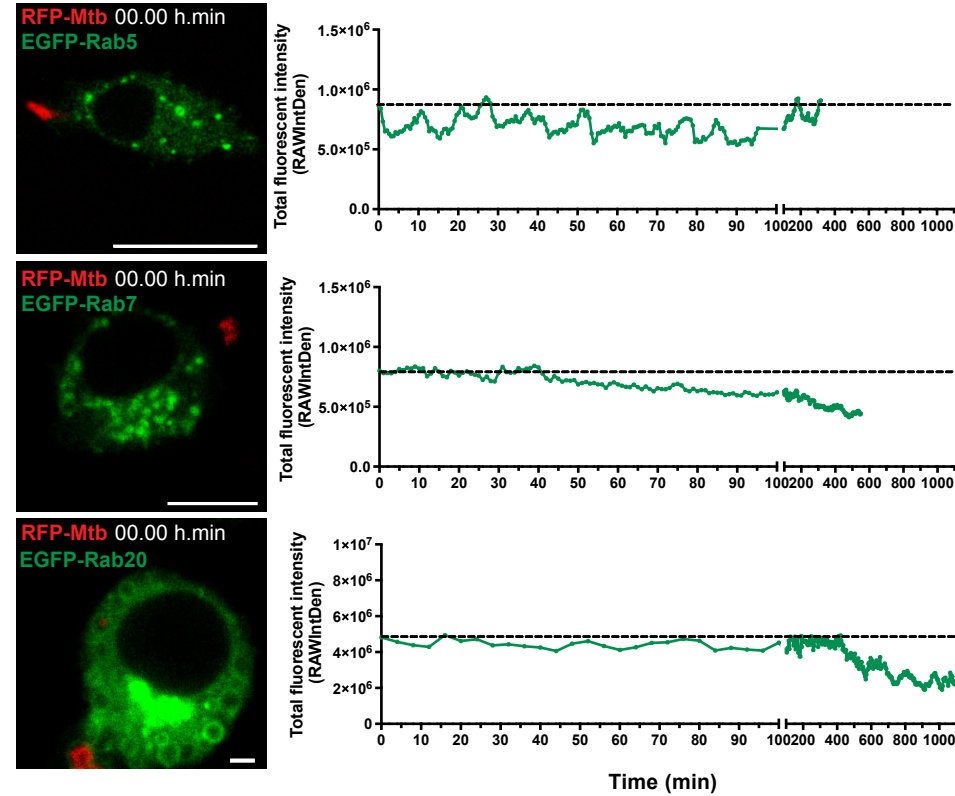

F

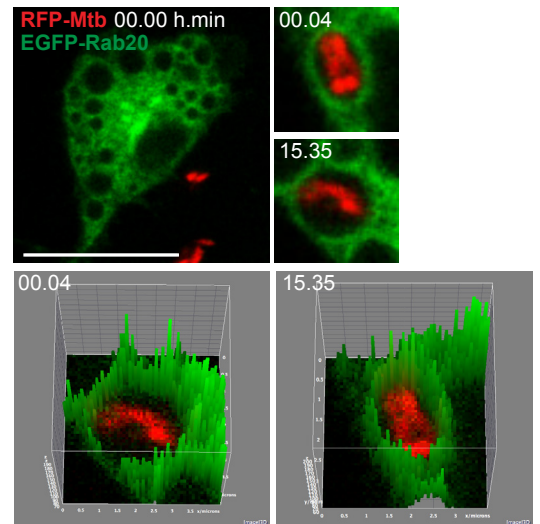

**Figure S2**

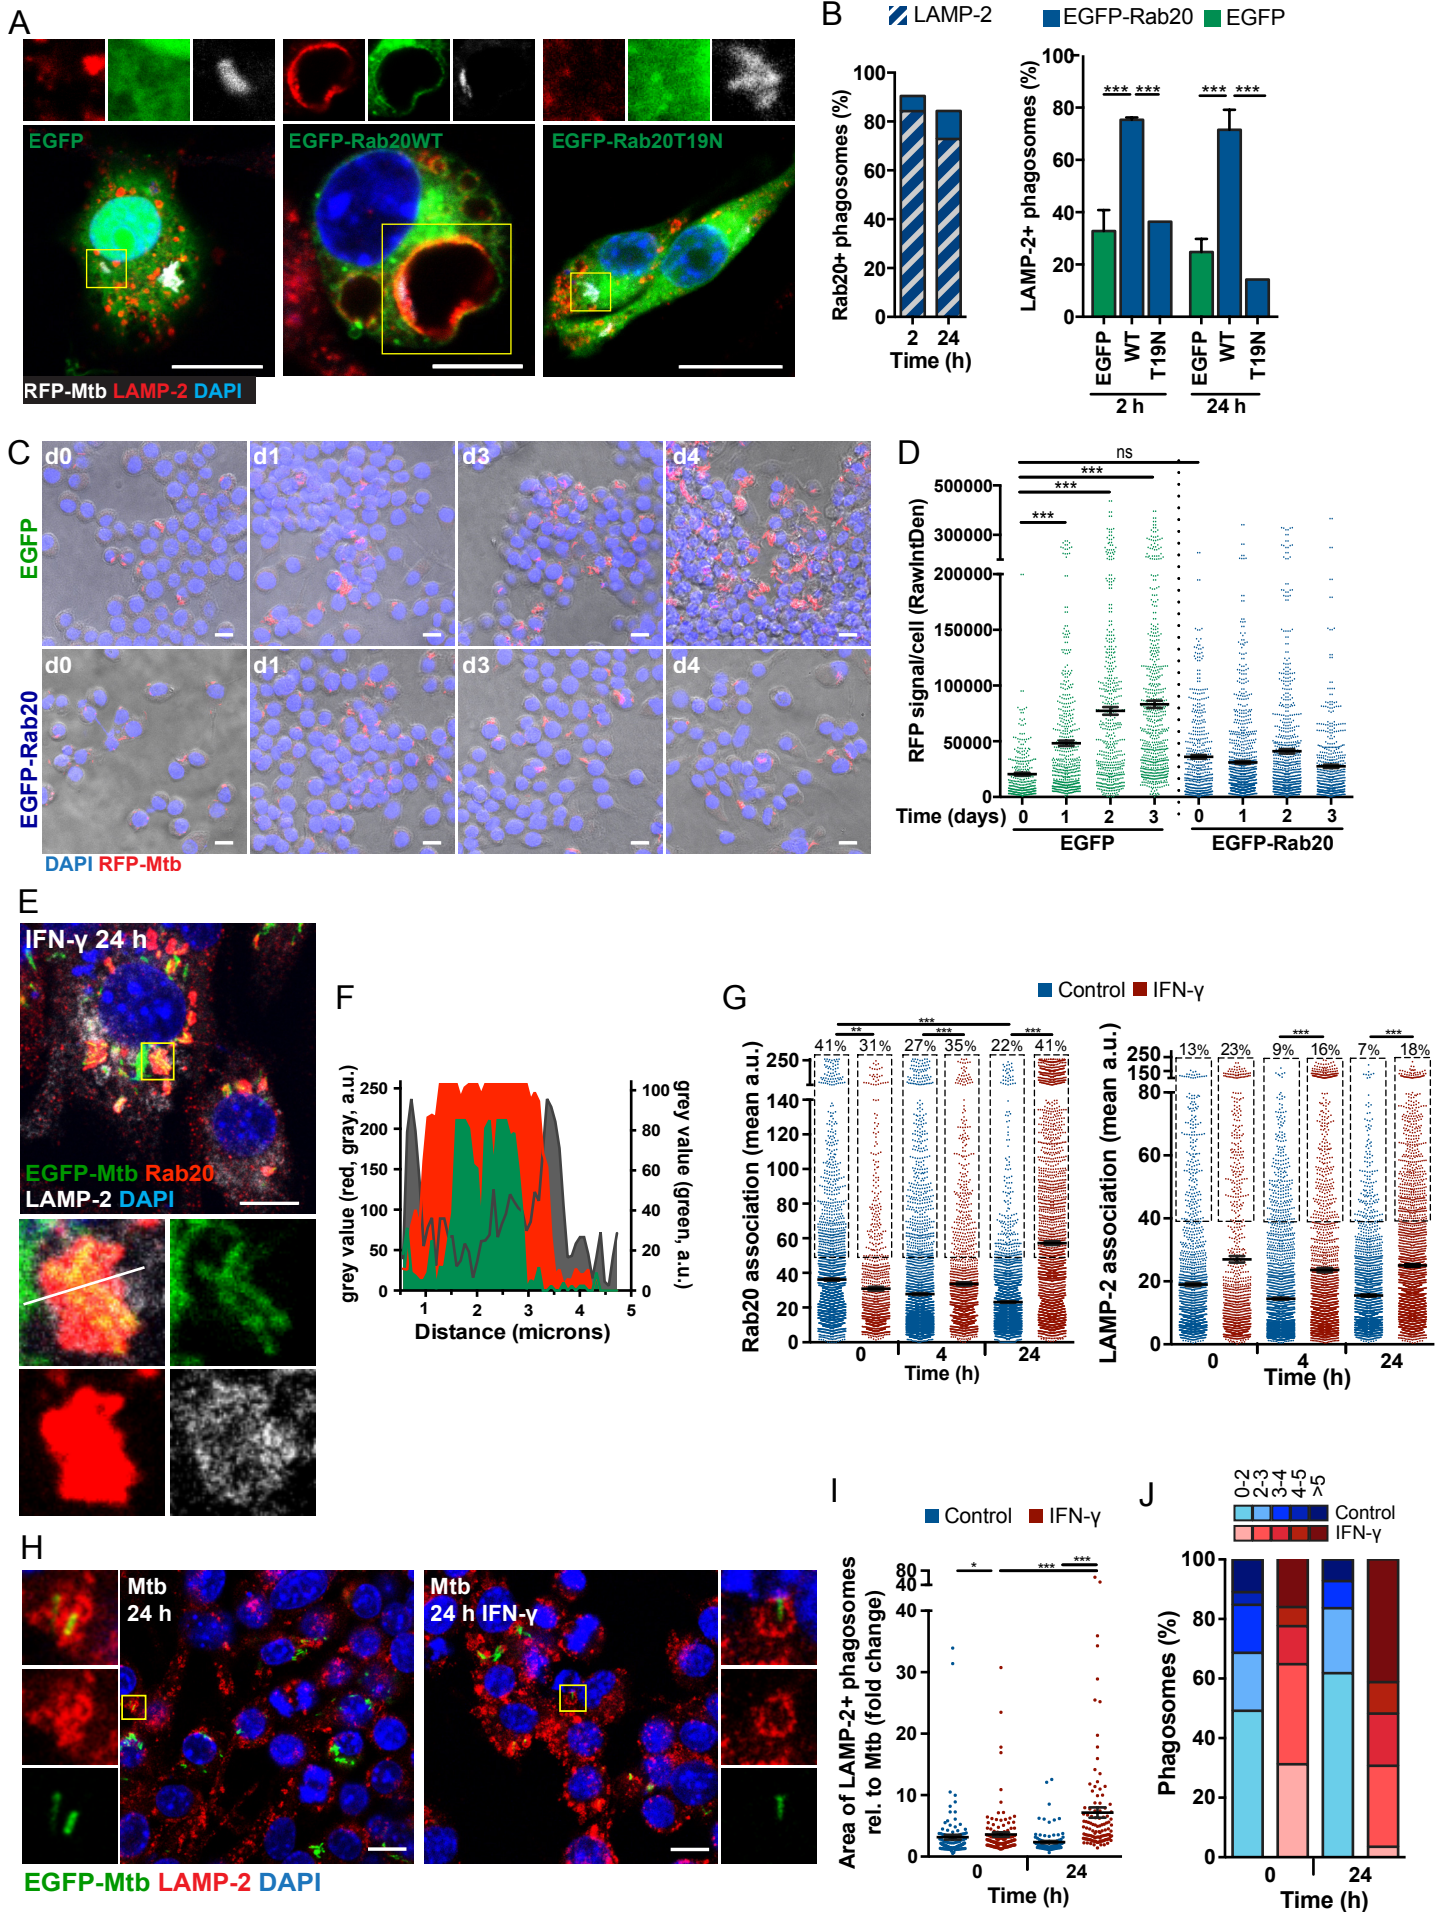



**Figure S3**

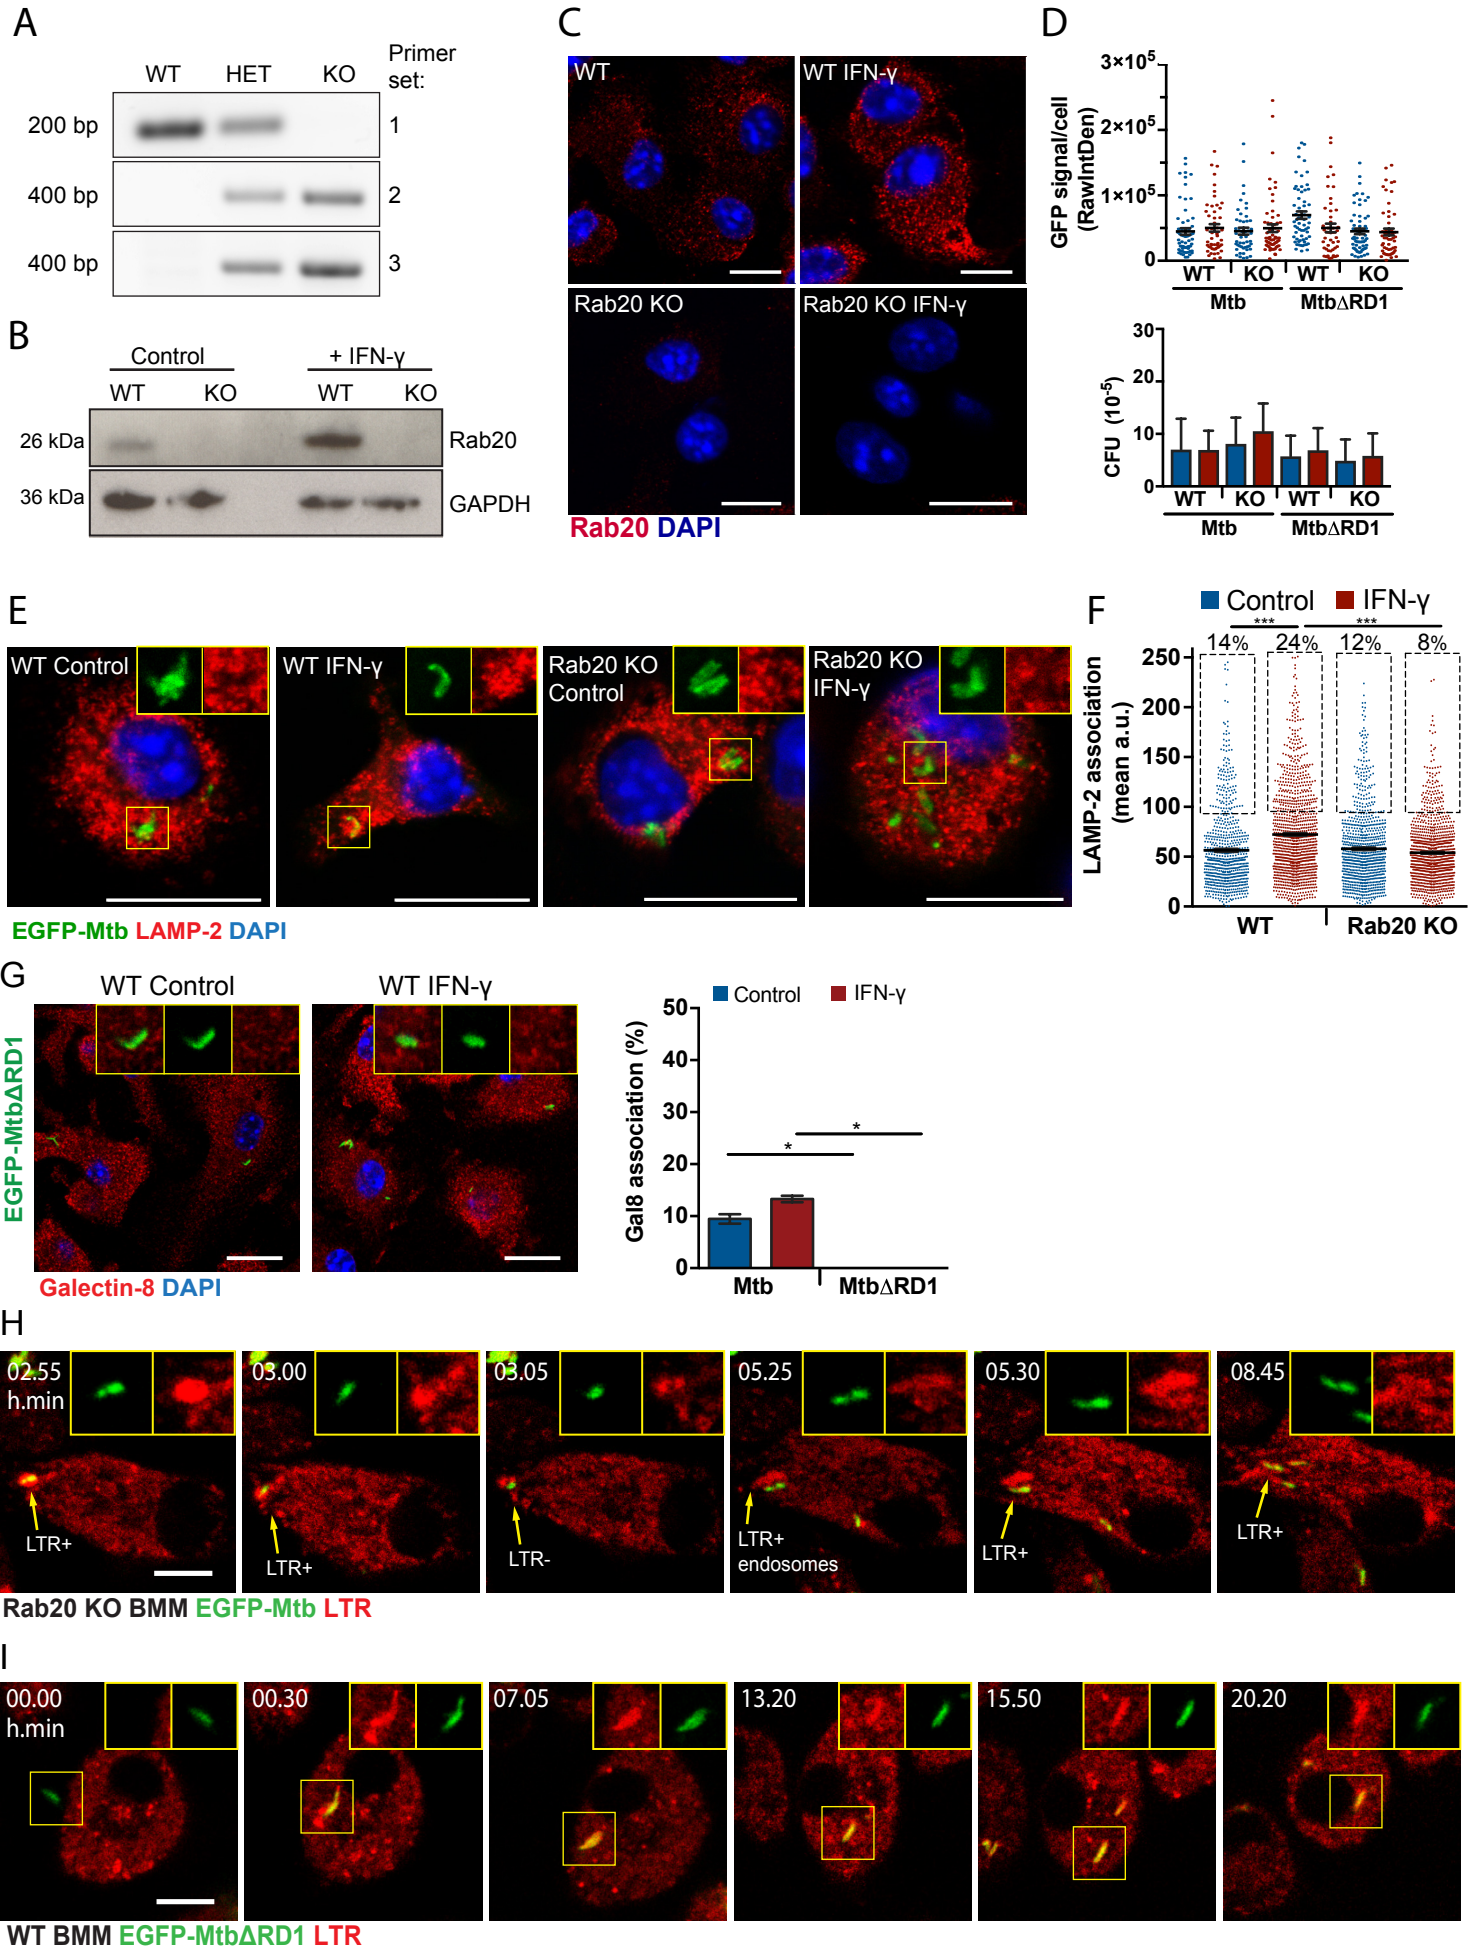

**Figure S4**

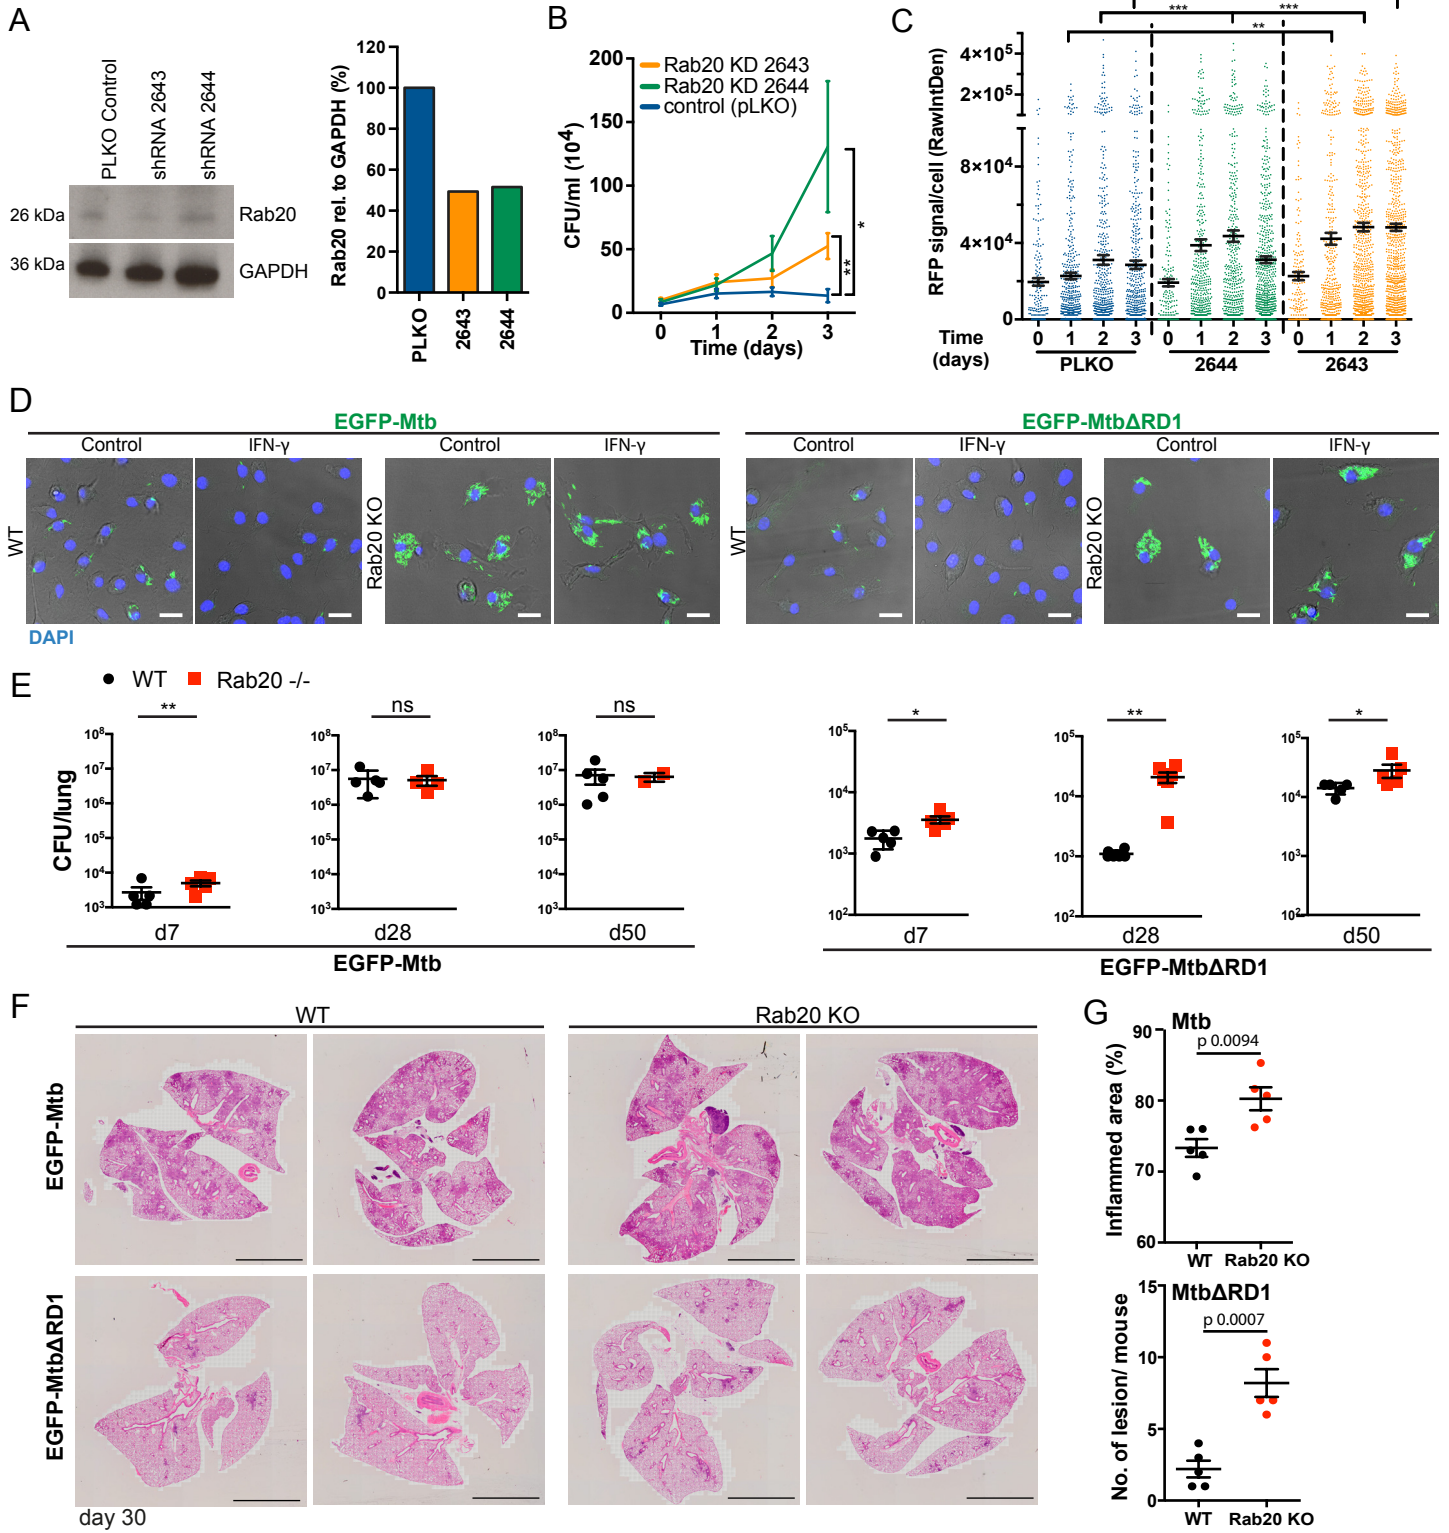

## **Supplemental figure legends:**

### **Fig. S1 (related to Fig.1)- Expression of EGFP-Rab20 targets Mtb to spacious phagolysosomes and restricts Mtb replication**

**A-** Rab5 does not associate with *M. tuberculosis* or *M. bovis* BCG after 30 min of infection. RAW264.7 macrophages were infected with EGFP-Mtb or EGFP-BCG for 30 min or 1 h. Samples were fixed and immunostained for Rab5 and the nuclear stain DAPI. Intensity profiles are shown along the white line cells infected for 30 min. Three independent experiments were performed. Scale bars: 10  $\mu$ m. **B-** Endogenous Rab5 is not associated with Mtb phagosomes between 2 h of initial infection and up to 24 h after infection. Macrophages were stimulated with IFN- $\gamma$  (5 ng/ml) for 24 hours prior to infection with EGFP-Mtb. Samples were immunostained for Rab5 and the nuclear stain DAPI. Three independent experiments were performed. Scale bars: 10  $\mu$ m. **C-** Representative images of uninfected RAW264.7 macrophages co-immunostained for Rab5 (red) and EEA1 or syntaxin 6 (green) and DAPI. Insets show regions with colocalisation of the analysed markers. Scale bars: 10  $\mu$ m. **D-** RAW264.7 macrophages were transfected with EGFP-Rab5, incubated with IFN- $\gamma$  (5 ng/ml), infected with RFP-Mtb and images were taken every 32 sec for up to 10 h. Rab5 association with Mtb is shown as mean  $\pm$  SEM from three independent experiments. Scale bar: 5  $\mu$ m. **E-** RAW264.7 macrophages transfected with indicated expression vectors were infected with RFP-Mtb. Images were taken every 32 sec or 4 min (EGFP-Rab20) for 24 h. **A-** The total relative green fluorescent intensity was measured over the time course of the live cell imaging. Representative quantification is shown for the depicted cells. **F-** 3D Surface plots of the EGFP-Rab20 positive RFP-Mtb phagosomes at the indicated time points post-infection.

### **Movie S1 (related to Fig.1)- Dynamic association of EGFP-Rab5 and EGFP-2xFYVE with Mtb phagosomes occurs in the first 5 min after internalisation**

RAW264.7 macrophages were transfected with EGFP-Rab5 or EGFP-2xFYVE and infected with RFP-Mtb. Images were taken every 32 sec for 24 h. Movie shows dynamic association of EGFP-Rab5 and EGFP-2xFYVE during the first 12 min after internalisation of RFP-Mtb (white arrow). Scale bars: 5  $\mu$ m.

### **Movie S2 (related to Fig.1)- Dynamic association of EGFP-Rab20 with Mtb phagosomes**

RAW264.7 macrophages were transfected with EGFP-Rab20 and infection with RFP-Mtb. Images were taken every 4 min for 24 h. Movie shows dynamic association of EGFP-Rab20 during the first 19 h after internalisation (0 min) of RFP-Mtb. Scale bar: 5  $\mu$ m.

**Fig. S2 (related to Fig. 1-2)- IFN- $\gamma$  targets Mtb to Rab20 and LAMP-2 positive spacious phagolysosomes**

**A-** RAW264.7 macrophages expressing EGFP, EGFP-Rab20 and EGFP-Rab20T19N infected with RFP-Mtb were fixed and stained for LAMP-2 and DAPI. Representative images are shown for 24 h of infection. Scale bars: 5  $\mu$ m. **B-** Percentage of EGFP-Rab20 positive phagosomes as well as LAMP-2 positive phagosomes in both EGFP and EGFP-Rab20 expressing RAW264.7 macrophages from (A) was analysed. Quantification is shown as mean  $\pm$  SEM from three independent experiments. \*\*\* $p < 0.001$ , one-way ANOVA with Tukey's multiple comparison test. **C-** Representative images showing growth of RFP-Mtb in RAW264.7 cells expressing EGFP or EGFP-Rab20. Samples were stained with the nuclear stain DAPI. Scale bars: 10  $\mu$ m. **D-** RFP-Mtb growth from (C) was analysed by RFP signal/cell. Symbols represent individual Mtb infected cells. Quantification is shown as mean  $\pm$  SEM from three independent experiments ns=statistically not significant, \*\*\* $p < 0.001$ , one-way ANOVA with Dunn's multiple comparison test. **E-** RAW264.7 were incubated with IFN- $\gamma$  (5 ng/ml) for 24 h prior to infection with EGFP-Mtb for the indicated time points. Representative image and their corresponding 3D surface plots (image and inset, left to right) of IFN- $\gamma$  stimulated RAW264.7 macrophages infected for 24 h. Cells were fixed and immunostained for Rab20, LAMP-2 and the nuclear stain DAPI. Scale bar: 10  $\mu$ m. **F-** Profile of Rab20 (red) and LAMP-2 (grey) associated with EGFP-Mtb (green) along the white line in (E). **G-** Quantification of Rab20 and LAMP-2 association with EGFP-Mtb in macrophages from (E). Symbols represent single bacteria or distinct Mtb groups. Quantification is shown as mean  $\pm$  SEM from three independent experiments. \*\*\* $p < 0.001$ , one-way ANOVA with Dunn's multiple comparison test. **H-** Representative images of LAMP-2 association with EGFP-Mtb in RAW264.7 macrophages. Scale bars: 10  $\mu$ m. **I-** LAMP-2 positive phagosomal area relative to their bacterial areas from (H). Symbols represent individual phagosomes. Quantification is shown as mean  $\pm$  SEM from three independent experiments. \* $p < 0.05$ , \*\*\* $p < 0.001$ , one-way ANOVA with Dunn's multiple comparison test. **J-** Percentage of spacious phagosomes from (H, I). Symbols represent individual phagosomes.

**Fig. S3 (related to Fig. 3)- Rab20 is required for Mtb phagosome integrity**

**A-** Rab20 KO mice were designed as part of the European Conditional Mouse Mutagenesis Program (EUCOMM). The targeting region was design as KO first allele<sup>3</sup> and introduced into the C57BL/6N background. Presence of the KO targeting vector in Rab20 KO mice by PCR. Primer set 1 amplifies the WT allele, primer set 2 amplifies part of the selectable marker region of the targeting vector and primer set 3 the exon 2 of Rab20. Introduction of the targeting vector into the Rab20 gene disrupts

gene expression already in the presence of the exon 2 in the ‘knockout-first’ allele. WT – wild type, HET – heterozygous, KO – knockout. **B-** BMM from WT or Rab20 KO mice were stimulated with IFN- $\gamma$  (5 ng/ml) for 24 h before cells were collected and samples prepared for Western blot analysis. GAPDH is visualised as a loading control. **C-** WT and Rab20 KO BMM were stimulated with IFN- $\gamma$  (5 ng/ml) for 24 h. Samples were fixed and stained for Rab20 and the nuclear marker DAPI. Scale bars: 10  $\mu$ m. **D-** Uptake of EGFP-Mtb/EGFP-Mtb $\Delta$ RD1 by WT and Rab20 KO BMM was measured by GFP signal/cell and CFU/ml. BMM were infected at a MOI of 0.5 for 2 hours before incubation in media for another 2 hours. Cells were then either fixed for immunofluorescence analysis or lysed and plated to measure bacterial load. Quantification is shown as mean  $\pm$  SEM from three independent experiments. Symbols represent individual Mtb infected cells. **E-** WT and Rab20 KO BMM were stimulated with IFN- $\gamma$  (5 ng/ml) for 24 h prior to infected with EGFP-Mtb for 24 h. BMM were fixed and immunostained for LAMP-2 and the nuclear stain DAPI. Scale bars: 5  $\mu$ m. **F-** Quantification of LAMP-2 association with EGFP-Mtb from (E) is shown as mean  $\pm$  SEM from three independent experiments. Symbols represent single bacteria or distinct Mtb groups. \*\*\* $p$ <0.001, one-way ANOVA with Dunn’s multiple comparison test. **G-** WT and Rab20 KO BMM were stimulated with IFN- $\gamma$  (5 ng/ml) for 24 h prior to infection with EGFP-Mtb or EGFP-Mtb $\Delta$ RD1 for 24 h. BMM were immunostained for galectin-8 and the nuclear stain DAPI. Scale bars: 10  $\mu$ m. Quantification is shown as mean  $\pm$  SEM from three independent experiments. \* $p$ <0.05, one-way ANOVA with Tukey’s multiple comparison test. **H-I-** WT or Rab20 KO BMM were incubated with 50 nM LysoTracker-Red (LTR) for 1 h before infection with EGFP-Mtb or EGFP-Mtb $\Delta$ RD1 and followed by live cell imaging for 24 h, with acquisition of an image every 5 min. Representative images for LTR association, loss and subsequent re-association with EGFP-Mtb in Rab20 KO BMM (H) and continuous LTR association with EGFP-Mtb $\Delta$ RD1 in WT BMM (I). Three independent experiments were performed. Scale bars: 5  $\mu$ m.

### **Movie S3 (related to Fig. 3)- Dynamic association of LysoTracker with Mtb phagosomes over 24 h**

WT BMM were incubated with 50 nM LysoTracker-Red (LTR) for 1 h before infection with EGFP-Mtb and followed by live cell imaging for 24 h, with acquisition of an image every 5 min. Movie shows retention, loss and subsequent re-acquisition of LTR to EGFP-Mtb phagosomes during the first 13 h after internalisation (0 min). Before LTR re-acquisition, LTR positive endosomes are observed close to bacteria. Scale bars: 5  $\mu$ m.



**Fig. S4 (related to Fig. 4)- Mtb replication in Rab20 KD RAW264.7 macrophages and Rab20 KO BMM**

**A-** Western blot of RAW264.7 cells expressing scrambled shRNA (PLKO) or shRNA against Rab20 (2644/2643). Rab20 levels are shown relative to GAPDH from one experiment out of three performed. **B-** RFP-Mtb growth was analysed by CFU/ml in RAW264.7 cells expressing shRNA against Rab20 (2644/2643). Quantification is shown as mean  $\pm$  SEM from three independent experiments. \* $p < 0.05$ , \*\* $p < 0.01$ , unpaired parametric Student's t test. **C-** RFP-Mtb growth was analysed by fluorescent signal/cell. Symbols represent individual Mtb infected cells. Quantification is shown as mean  $\pm$  SEM from three independent experiments. \*\* $p < 0.01$ , \*\*\* $p < 0.001$ , one-way ANOVA with Dunn's multiple comparison test. **D-** WT and Rab20 KO BMM were incubated with IFN- $\gamma$  (5 ng/ml) for 24 h prior to infection with EGFP-Mtb or EGFP-Mtb $\Delta$ RD1 at a MOI of 0.5 for 3 days. Representative images showing growth of EGFP-Mtb/ EGFP-Mtb $\Delta$ RD1 in WT and Rab20 KO BMM at 3 days post infection. Scale bars: 10  $\mu$ m. **E-** Growth of EGFP-Mtb/EGFP-Mtb $\Delta$ RD1 in lungs of WT and Rab20<sup>-/-</sup> mice. Data shows mean  $\pm$  SEM from one representative experiment out of two. Symbols represent individual mice. \* $p < 0.05$ , \*\* $p < 0.01$ , ns=not significant, 2-tailed Student's t test. **F-** H&E stained lung sections of WT and Rab20<sup>-/-</sup> mice infected with EGFP-Mtb/EGFP-Mtb $\Delta$ RD1 for 30 days. Scale bars: 4 mm. **G-** Inflamed area or number of lesions in lungs of WT or Rab20<sup>-/-</sup> mice infected with EGFP-Mtb/ EGFP-Mtb $\Delta$ RD1 for 30 days from (F). Quantification is shown as mean  $\pm$  SEM from one experiment. Symbols represent individual mice. Parametric unpaired Student's t-test.
